# Supplementary material for: What impact have Covid-19 pandemic era on violence against women in India from January 2020 to December 2021- A Retrospective comparative research study
Source: Research Square preprint supplement (doi:10.21203/rs.3.rs-1256722/v1), 2022-01-13
Supplement: Supplementary file 1 [file 890f34ce43609d822469a262.docx]

Source - **भारत सरकार / Government of India**

**राष्ट्रीय महिलाआयोग / National Commission for Women**

**Nature-Wise Report of the Complaints Received by NCW in the Year: 2018 (Report generated through 117.237.235.166 at 12/01/2022 18:15:43)**

| **S. No.** | **Nature** | **Jan** | **Feb** | **Mar** | **Apr** | **May** | **Jun** | **Jul** | **Aug** | **Sep** | **Oct** | **Nov** | **Dec** | **Total** |
| --- | --- | --- | --- | --- | --- | --- | --- | --- | --- | --- | --- | --- | --- | --- |
| 1 | Bigamy / Polygamy | 8 | 8 | 26 | 21 | 13 | 17 | 11 | 10 | 11 | 8 | 20 | 9 | **162** |
| 2 | Cyber Crime against women | 26 | 24 | 14 | 41 | 35 | 33 | 31 | 47 | 33 | 26 | 36 | 29 | **375** |
| 3 | Denial of Maternity Benefits to women | 0 | 0 | 0 | 0 | 0 | 0 | 0 | 0 | 0 | 0 | 1 | 0 | **1** |
| 4 | Dowry death | 0 | 0 | 0 | 0 | 0 | 0 | 1 | 0 | 0 | 0 | 0 | 0 | **1** |
| 5 | Dowry harassment / dowry death | 146 | 200 | 316 | 402 | 296 | 305 | 235 | 235 | 233 | 208 | 502 | 167 | **3245** |
| 6 | Free legal aid for women | 27 | 22 | 23 | 49 | 29 | 35 | 22 | 26 | 10 | 17 | 52 | 34 | **346** |
| 7 | Gender Discrimination including equal right to education & work | 2 | 2 | 4 | 6 | 0 | 9 | 4 | 5 | 6 | 5 | 5 | 6 | **54** |
| 8 | Harassment of married women/Dowry harassment | 0 | 0 | 0 | 0 | 0 | 1 | 0 | 0 | 0 | 1 | 1 | 0 | **3** |
| 9 | Indecent Representation of Women | 5 | 11 | 5 | 11 | 2 | 14 | 6 | 16 | 4 | 10 | 12 | 7 | **103** |
| 10 | Outraging Modesty of Women | 49 | 109 | 68 | 104 | 133 | 107 | 76 | 61 | 73 | 92 | 236 | 57 | **1165** |
| 11 | Police Apathy against women | 103 | 110 | 223 | 244 | 201 | 181 | 96 | 166 | 161 | 193 | 588 | 223 | **2489** |
| 12 | Privacy of women and rights thereof | 6 | 17 | 4 | 27 | 7 | 11 | 12 | 15 | 10 | 17 | 15 | 9 | **150** |
| 13 | Protection of Women against Domestic Violence | 0 | 0 | 0 | 0 | 0 | 0 | 1 | 0 | 0 | 0 | 0 | 0 | **1** |
| 14 | Reproductive health rights of women | 4 | 6 | 7 | 14 | 10 | 5 | 11 | 7 | 5 | 3 | 15 | 3 | **90** |
| 15 | Right to Exercise Choice in marriage | 20 | 45 | 46 | 58 | 42 | 43 | 20 | 26 | 38 | 33 | 67 | 32 | **470** |
| 16 | Right to live with dignity | 450 | 722 | 658 | 876 | 859 | 633 | 457 | 529 | 462 | 470 | 1265 | 403 | **7784** |
| 17 | Right to live with dignity | 0 | 1 | 0 | 1 | 0 | 2 | 0 | 0 | 1 | 2 | 0 | 0 | **7** |
| 18 | Sex selective abortion /female foeticide / amniocentesis | 2 | 6 | 4 | 3 | 2 | 3 | 2 | 8 | 5 | 9 | 8 | 3 | **55** |
| 19 | Sexual harassment including sexual harassment at workplace | 44 | 70 | 102 | 112 | 71 | 96 | 53 | 77 | 55 | 86 | 123 | 74 | **963** |
| 20 | Sexual Harassment of Women at workplace | 0 | 0 | 0 | 0 | 0 | 1 | 0 | 0 | 1 | 0 | 0 | 0 | **2** |
| 21 | Stalking / Voyeurism | 9 | 21 | 11 | 19 | 7 | 14 | 6 | 10 | 11 | 23 | 17 | 10 | **158** |
| 22 | Traditional practices derogatory to women rights i.e. sati pratha, devdasi pratha, witch hunting | 6 | 1 | 2 | 0 | 1 | 1 | 0 | 4 | 1 | 3 | 3 | 0 | **22** |
| 23 | Trafficking / Prostitution of women | 3 | 8 | 18 | 21 | 8 | 4 | 6 | 14 | 7 | 5 | 23 | 4 | **121** |
| 24 | Violence against women | 92 | 143 | 211 | 270 | 210 | 185 | 137 | 160 | 126 | 120 | 344 | 84 | **2082** |
| 25 | Women's right of custody of children in the event of divorce | 2 | 9 | 2 | 3 | 9 | 3 | 5 | 6 | 6 | 4 | 6 | 4 | **59** |
| 26 | Total | 1004 | 1535 | 1744 | 2282 | 1935 | 1703 | 1192 | 1422 | 1259 | 1335 | 3339 | 1158 | **19908** |

**भारत सरकार / Government of India / राष्ट्रीय महिला आयोग / National Commission for Women**

**Nature-Wise Report of the Complaints Received by NCW in the Year: 2019 (Report generated through 117.237.235.166 at 12/01/2022 18:16:38)**

| **S. No.** | **Nature** | **Jan** | **Feb** | **Mar** | **Apr** | | **May** | **Jun** | | **Jul** | **Aug** | **Sep** | | **Oct** | | **Nov** | **Dec** | **Total** |
| --- | --- | --- | --- | --- | --- | --- | --- | --- | --- | --- | --- | --- | --- | --- | --- | --- | --- | --- |
| **1** | **Acid Attack** | **4** | **4** | **0** | **1** | | **2** | **1** | | **1** | **4** | **0** | | **1** | | **0** | **2** | **20** |
| **2** | **Bigamy / Polygamy** | **18** | **11** | **11** | **14** | | **12** | **10** | | **11** | **14** | **11** | | **9** | | **9** | **21** | **151** |
| **3** | **Cyber Crime against women** | **39** | **30** | **22** | **35** | | **49** | **33** | | **43** | **61** | **40** | | **35** | | **35** | **37** | **459** |
| **4** | **Denial of Maternity Benefits to women** | **3** | **16** | **7** | **8** | | **10** | **5** | | **11** | **10** | **12** | | **19** | | **12** | **23** | **136** |
| **5** | **Dowry death** | **14** | **22** | **16** | **13** | | **46** | **14** | | **31** | **49** | **56** | | **38** | | **32** | **42** | **373** |
| **6** | **Free legal aid for women** | **36** | **27** | **11** | **16** | | **15** | **11** | | **26** | **7** | **10** | | **13** | | **12** | **5** | **189** |
| **7** | **Gender Discrimination including equal right to education & work** | **5** | **2** | **4** | **7** | | **6** | **3** | | **3** | **6** | **5** | | **3** | | **2** | **1** | **47** |
| **8** | **Harassment of married women/Dowry harassment** | **207** | **200** | **204** | **228** | | **397** | **316** | | **361** | **468** | **468** | | **391** | | **368** | **275** | **3883** |
| **9** | **Indecent Representation of Women** | **2** | **7** | **6** | **7** | | **10** | **11** | | **14** | **11** | **13** | | **7** | | **7** | **9** | **104** |
| **10** | **Outraging modesty of women/ Molestation** | **62** | **68** | **59** | **70** | | **150** | **108** | | **132** | **198** | **165** | | **102** | | **105** | **101** | **1320** |
| **11** | **Police Apathy against women** | **321** | **228** | **132** | **149** | | **218** | **161** | | **238** | **408** | **177** | | **154** | | **112** | **98** | **2396** |
| **12** | **Privacy of women and rights thereof** | **4** | **0** | **0** | **0** | | **0** | **0** | | **0** | **0** | **0** | | **0** | | **0** | **0** | **4** |
| **13** | **Protection of Women against Domestic Violence** | **133** | **181** | **148** | **193** | | **266** | **260** | | **391** | **419** | **255** | | **252** | | **243** | **219** | **2960** |
| **14** | **Rape/Attempt to Rape** | **78** | **68** | **63** | **49** | | **150** | **88** | | **115** | **178** | **168** | | **129** | | **137** | **116** | **1339** |
| **15** | **Right to Exercise Choice in marriage** | **10** | **0** | **0** | **0** | | **0** | **0** | | **0** | **0** | **0** | | **0** | | **0** | **0** | **10** |
| **16** | **Right to exercise choice in marriage/Honour Crimes** | **16** | **56** | **33** | **25** | | **48** | **35** | | **33** | **56** | **41** | | **32** | | **36** | **23** | **434** |
| **17** | **Right to live with dignity** | **266** | **296** | **269** | **204** | | **234** | **201** | | **288** | **747** | **819** | | **584** | | **434** | **352** | **4694** |
| **18** | **Sex selective abortion /female foeticide /amniocentesis** | **3** | **2** | **2** | **2** | | **2** | **2** | | **3** | **2** | **4** | | **2** | | **1** | **0** | **25** |
| **19** | **Sexual Assault** | **24** | **7** | **4** | **11** | | **13** | **16** | | **19** | **29** | **24** | | **17** | | **17** | **14** | **195** |
| **20** | **Sexual Harassment** | **19** | **26** | **17** | **25** | | **35** | **26** | | **45** | **45** | **40** | | **40** | | **27** | **24** | **369** |
| **21** | **Sexual Harassment of Women at workplace** | **29** | **36** | **23** | **26** | | **26** | | **16** | **22** | **35** | **45** | | **29** | | **25** | **18** | **330** |
| **22** | **Stalking / Voyeurism** | **4** | **14** | **7** | | **16** | **15** | **10** | | **20** | **25** | | **20** | **18** | **16** | | **14** | **179** |
| **23** | **Traditional practices derogatory to women rights i.e. sati pratha, devdasi pratha, witch hunting** | **3** | **1** | **0** | | **2** | **3** | **3** | | **2** | **0** | | **1** | **1** | **0** | | **2** | **18** |
| **24** | **Trafficking / Prostitution of women** | **4** | **2** | **3** | | **3** | **5** | **10** | | **6** | **6** | | **4** | **5** | **11** | | **5** | **64** |
| **25** | **Women's right of custody of children in the event of divorce** | **1** | **1** | **3** | | **2** | **5** | **1** | | **3** | **8** | | **1** | **4** | **1** | | **1** | **31** |
| **26** | **Total** | **1305** | **1305** | **1044** | | **1106** | **1717** | **1341** | | **1818** | **2786** | | **2379** | **1885** | **1642** | | **1402** | **19730** |

**भारत सरकार / Government of India / राष्ट्रीय महिला आयोग / National Commission for Women**

**Nature-Wise Report of the Complaints Received by NCW in the Year: 2020 (Report generated through 117.237.235.166 at 12/01/2022 18:16:38)**

| **S.No.** | **Nature** | **Jan** | | **Feb** | **Mar** | | **Apr** | | **May** | **Jun** | **Jul** | | **Aug** | **Sep** | **Oct** | **Nov** | **Dec** | **Total** |
| --- | --- | --- | --- | --- | --- | --- | --- | --- | --- | --- | --- | --- | --- | --- | --- | --- | --- | --- |
| 1 | Acid Attack | 1 | | 2 | 0 | | 0 | | 0 | 3 | 1 | | 0 | 0 | 0 | 3 | 1 | **11** |
| 2 | Bigamy / Polygamy | 10 | | 7 | 6 | | 6 | | 18 | 14 | 23 | | 8 | 10 | 11 | 10 | 18 | **141** |
| 3 | Cyber Crime against women | 32 | | 21 | 37 | | 55 | | 73 | 103 | 110 | | 68 | 59 | 48 | 42 | 56 | **704** |
| 4 | Denial of Maternity Benefitsto women | 9 | | 10 | 13 | | 2 | | 6 | 13 | 5 | | 9 | 9 | 6 | 8 | 6 | **96** |
| 5 | Dowry death | 32 | | 17 | 18 | | 9 | | 27 | 27 | 49 | | 32 | 29 | 26 | 37 | 27 | **330** |
| 6 | Free legal aid for women | 5 | | 7 | 4 | | 0 | | 6 | 4 | 5 | | 3 | 6 | 5 | 4 | 7 | **56** |
| 7 | Gender Discriminationincluding equal right toeducation & work | 1 | | 0 | 0 | | 1 | | 1 | 0 | 5 | | 0 | 1 | 0 | 2 | 0 | **11** |
| 8 | Harassment of marriedwomen/Dowry harassment | 267 | | 221 | 203 | | 62 | | 159 | 273 | 493 | | 352 | 372 | 429 | 509 | 448 | **3788** |
| 9 | Indecent Representation ofWomen | 2 | | 1 | 1 | | 1 | | 8 | 3 | 1 | | 3 | 4 | 2 | 3 | 0 | **29** |
| 10 | Outraging modesty ofwomen/Molestation | 112 | | 103 | 103 | | 29 | | 140 | 203 | 330 | | 173 | 131 | 112 | 124 | 119 | **1679** |
| 11 | Police Apathy against women | 81 | | 89 | 83 | | 24 | | 85 | 118 | 146 | | 118 | 131 | 136 | 133 | 132 | **1276** |
| 12 | Protection of Women againstDomestic Violence | 271 | | 302 | 298 | | 315 | | 393 | 461 | 660 | | 539 | 492 | 495 | 485 | 586 | **5297** |
| 13 | Rape/Attempt to Rape | 142 | | 112 | 90 | | 12 | | 54 | 82 | 149 | | 108 | 88 | 111 | 151 | 137 | **1236** |
| 14 | Right to exercise choice inmarriage/Honour Crimes | 41 | | 28 | 34 | | 6 | | 26 | 45 | 60 | | 24 | 30 | 52 | 48 | 66 | **460** |
| 15 | Right to live with dignity | 374 | | 436 | 388 | | 239 | | 474 | 611 | 778 | | 613 | 889 | 873 | 1210 | 830 | **7715** |
| 16 | Sex selective abortion / female foeticide / amniocentesis | 0 | | 0 | 0 | | 0 | | 0 | 0 | 2 | | 0 | 0 | 0 | 4 | 2 | **8** |
| 17 | Sexual Assault | 12 | | 10 | 19 | | 4 | | 1 | 8 | 14 | | 9 | 5 | 4 | 11 | 13 | **110** |
| 18 | Sexual Harassment | 22 | | 20 | 19 | | 11 | | 8 | 42 | 50 | | 32 | 29 | 33 | 56 | 54 | **376** |
| 19 | Sexual Harassment of Women at workplace | 21 | | 18 | 19 | | 8 | | 5 | 13 | 16 | | 27 | 19 | 14 | 23 | 18 | **201** |
| 20 | Stalking / Voyeurism | 18 | | 16 | 9 | | 15 | | 12 | 19 | 13 | | 7 | 11 | 9 | 10 | 5 | **144** |
| 21 | Traditional practices derogatory to women rights i.e. sati pratha, devdasi pratha, witch hunting | 0 | | 0 | 0 | | 0 | | 0 | 0 | 0 | | 0 | 0 | 2 | 2 | 0 | **4** |
| 22 | Trafficking / Prostitution of women | 6 | 4 | | | 3 | | 1 | 2 | 1 | 4 | 2 | | 2 | 4 | 8 | 3 | **40** |
| 23 | Women's right of custody of children in the event of divorce | 3 | 0 | | | 0 | | 0 | 2 | 0 | 0 | 1 | | 1 | 1 | 1 | 1 | **10** |
| 24 | Total | 1462 | 1424 | | | 1347 | | 800 | 1500 | 2043 | 2914 | 2128 | | 2318 | 2373 | 2884 | 2529 | **23722** |

**भारत सरकार / Government of India / राष्ट्रीय महिला आयोग / National Commission for Women**

**Nature-Wise Report of the Complaints Received by NCW in the Year: 2021 (Report generated through 117.237.235.166 at 12/01/2022 18:16:38)**

| **No.** | **Nature** | | | **Jan** | **Feb** | | **Mar** | | **Apr** | | **May** | | **Jun** | | **Jul** | | **Aug** | | **Sep** | | **Oct** | | **Nov** | | **Dec** | **Total** |
| --- | --- | --- | --- | --- | --- | --- | --- | --- | --- | --- | --- | --- | --- | --- | --- | --- | --- | --- | --- | --- | --- | --- | --- | --- | --- | --- |
| **1** | **Acid Attack** | | | **0** | **0** | | **1** | | **2** | | **0** | | **1** | | **1** | | **4** | | **1** | | **1** | | **2** | | **1** | **14** |
| **2** | **Bigamy / Polygamy** | | | **16** | **22** | | **25** | | **14** | | **14** | | **20** | | **26** | | **21** | | **15** | | **15** | | **18** | | **23** | **229** |
| **3** | **Cyber Crime against women** | | | **66** | **42** | | **75** | | **78** | | **98** | | **78** | | **85** | | **65** | | **101** | | **53** | | **66** | | **56** | **863** |
| **4** | **Denial of Maternity Benefits to women** | | | **8** | **6** | | **9** | | **9** | | **4** | | **2** | | **11** | | **5** | | **7** | | **3** | | **1** | | **5** | **70** |
| **5** | **Dowry death** | | | **27** | **16** | | **21** | | **18** | | **26** | | **23** | | **43** | | **42** | | **38** | | **32** | | **24** | | **31** | **341** |
| **6** | **Free legal aid for women** | | | **5** | **3** | | **8** | | **3** | | **2** | | **3** | | **1** | | **1** | | **1** | | **0** | | **2** | | **2** | **31** |
| **7** | **Gender Discrimination including equal right to education & work** | | | **1** | **4** | | **2** | | **0** | | **1** | | **0** | | **2** | | **0** | | **5** | | **2** | | **0** | | **1** | **18** |
| **8** | **Harassment of married women/Dowry harassment** | | | **396** | **353** | | **363** | | **309** | | **251** | | **400** | | **441** | | **468** | | **458** | | **417** | | **361** | | **396** | **4613** |
| **9** | **Indecent Representation of Women** | | | **0** | **3** | | **5** | | **0** | | **0** | | **0** | | **2** | | **1** | | **4** | | **3** | | **1** | | **2** | **21** |
| **10** | **Not Categorized yet** | | | **0** | **0** | | **0** | | **0** | | **1** | | **0** | | **1** | | **0** | | **0** | | **2** | | **0** | | **3** | **7** |
| **11** | **Outraging modesty of women/Molestation** | | | **139** | **137** | | **165** | | **131** | | **79** | | **159** | | **145** | | **188** | | **274** | | **148** | | **142** | | **132** | **1839** |
| **12** | **Police Apathy against women** | | | **125** | **123** | | **189** | | **91** | | **79** | | **107** | | **173** | | **157** | | **152** | | **131** | | **135** | | **90** | **1552** |
| **13** | **Protection of Women against Domestic Violence** | | | **568** | **493** | | **562** | | **358** | | **402** | | **542** | | **721** | | **706** | | **733** | | **611** | | **464** | | **524** | **6684** |
| **14** | **Rape/Attempt to Rape** | | | **137** | **120** | | **144** | | **99** | | **97** | | **116** | | **163** | | **174** | | **178** | | **143** | | **150** | | **160** | **1681** |
| **15** | **Right to exercise choice in marriage/Honour Crimes** | | | **41** | **40** | | **41** | | **34** | | **22** | | **40** | | **48** | | **42** | | **27** | | **30** | | **41** | | **36** | **442** |
| **16** | **Right to live with dignity** | | | **586** | **660** | | **926** | | **698** | | **677** | | **1157** | | **1278** | | **1147** | | **1230** | | **925** | | **821** | | **980** | **11085** |
| **17** | **Sex selective abortion /female foeticide /amniocentesis** | | | **5** | **1** | | **3** | | **4** | | **1** | | **1** | | **1** | | **3** | | **1** | | **1** | | **1** | | **1** | **23** |
| **18** | **Sexual Assault** | | | **7** | **4** | | **13** | | **17** | | **21** | | **10** | | **11** | | **8** | | **16** | | **10** | | **13** | | **15** | **145** |
| **19** | **Sexual Harassment** | | | **59** | **44** | | **62** | | **38** | | **36** | | **56** | | **47** | | **47** | | **45** | | **56** | | **58** | | **76** | **624** |
| **20** | **Sexual Harassment of Women at workplace** | | | **23** | **25** | | **24** | | **19** | | **6** | | **14** | | **19** | | **27** | | **31** | | **20** | | **15** | | **27** | **250** |
| **21** | **Stalking / Voyeurism** | | | **13** | **22** | | **28** | | **19** | | **18** | | **22** | | **21** | | **25** | | **25** | | **27** | | **14** | | **26** | **260** |
| **22** | **Traditional practices derogatory to women rights i.e. sati pratha, devdasi pratha, witch hunting** | | | **1** | **1** | | **0** | | **3** | | **1** | | **2** | | **3** | | **0** | | **3** | | **1** | | **2** | | **1** | **18** |
| **23** | **Trafficking / Prostitution of women** | **6** | **5** | | | **4** | | **2** | | **1** | | **2** | | **5** | | **9** | | **7** | | **1** | | **5** | | **2** | | **49** |
| **24** | **Women's right of custody ofchildren in the event of divorce** | **0** | **1** | | | **0** | | **2** | | **0** | | **0** | | **0** | | **1** | | **1** | | **0** | | **1** | | **0** | | **6** |
| **25** | **Total** | **2229** | **2125** | | | **2670** | | **1948** | | **1837** | | **2755** | | **3248** | | **3141** | | **3353** | | **2632** | | **2337** | | **2590** | | **30865** |

| Nature of Violence | Year-2018 | Year-2019 | Year-2020 | Year-2021 |
| --- | --- | --- | --- | --- |
| Bigamy / Polygamy | **162** | **151** | **141** | **229** |
| Cyber Crime against women | **375** | **459** | **704** | **863** |
| Denial of Maternity Benefits to women | **1** | **136** | **96** | **70** |
| Dowry death | **1** | 373 | **330** | **341** |
| Dowry harassment / dowry death | **3245** | 3883 | **3788** | **4613** |
| Free legal aid for women | **346** | 189 | **56** | **31** |
| Gender Discrimination including equal right to education & work | **54** | 47 | **11** | **18** |
| Harassment of married women/Dowry harassment | **3** |  |  |  |
| Indecent Representation of Women | **103** | 104 | **29** | **21** |
| Outraging Modesty of Women | **1165** | 1320 | **1679** | **1839** |
| Police Apathy against women | **2489** | 2396 | **1276** | **1552** |
| Privacy of women and rights thereof | **150** | 4 |  |  |
| Protection of Women against Domestic Violence | **1** | 2960 | **5297** | **6684** |
| Reproductive health rights of women | **90** |  |  |  |
| Right to Exercise Choice in marriage | **470** | 10 | **460** |  |
| Right to live with dignity | **7784** | 4694 | **7715** | **11085** |
| Right to live with dignity | **7** |  |  |  |
| Sex selective abortion /female foeticide / amniocentesis | **55** | 25 | **8** | **23** |
| Sexual harassment including sexual harassment at workplace | **963** | 369 | **376** | **624** |
| Sexual Harassment of Women at workplace | **2** | 330 | **201** | **250** |
| Stalking / Voyeurism | **158** | 179 | **144** | **260** |
| Traditional practices derogatory to women rights i.e. sati pratha, devdasi pratha, witch hunting | **22** | 18 | **4** | **18** |
| Trafficking / Prostitution of women | **121** | 64 | **40** | **49** |
| Violence against women | **2082** |  |  |  |
| Women's right of custody of children in the event of divorce | **59** | 31 | **10** | **6** |
| Acid attack |  | 20 | 11 | **14** |
| Rape/Attempt to Rape |  | 1339 | **1236** | **1681** |
| Right to exercise choice in marriage/Honour Crimes |  | **434** |  | **442** |
| Sexual Assault |  | **195** | **110** | **145** |
| Not categorised |  |  |  | **7** |
| Total | 19908 | 19730 | 23722 | **30865** |
